# Supplementary material
Source: Springer Nature journal article supplement (https://www.springermedizin.de/resource/supplementary/12955_2003_28_MOESM6_ESM.pdf/9558402)
Supplement: MOESM6 [file 9558402]

## Menopause Rating Scale (MRS)

¿Cuál de los siguientes síntomas sufre en la actualidad y con qué intensidad? Marque la casilla pertinente de cada síntoma. Marque "no procede" cuando no sufra el síntoma.

**Síntomas:**

|              |                                                                                                                                    | no procede               | leve                     | moderado                 | extremadamente<br>grave grave |
|--------------|------------------------------------------------------------------------------------------------------------------------------------|--------------------------|--------------------------|--------------------------|-------------------------------|
|              |                                                                                                                                    | -----                    | -----                    | -----                    | -----                         |
| Puntuación = |                                                                                                                                    | 0                        | 1                        | 2                        | 3 4                           |
| 1.           | Sofocos, sudación (episodios de sudación).....                                                                                     | <input type="checkbox"/> | <input type="checkbox"/> | <input type="checkbox"/> | <input type="checkbox"/>      |
| 2.           | Molestias cardíacas<br>(consciencia no habitual de los latidos, bradicardia,<br>taquicardia, opresión torácica).....               | <input type="checkbox"/> | <input type="checkbox"/> | <input type="checkbox"/> | <input type="checkbox"/>      |
| 3.           | Trastornos del sueño (dificultades a la hora de<br>dormirse, se despierta con facilidad, se despierta pronto).....                 | <input type="checkbox"/> | <input type="checkbox"/> | <input type="checkbox"/> | <input type="checkbox"/>      |
| 4.           | Estado de ánimo depresivo (sentirse deprimida, triste,<br>a punto de llorar, falta de ímpetu, cambios de estado<br>de ánimo) ..... | <input type="checkbox"/> | <input type="checkbox"/> | <input type="checkbox"/> | <input type="checkbox"/>      |
| 5.           | Irritabilidad (sentirse nerviosa, tensión interna,<br>sentirse agresiva) .....                                                     | <input type="checkbox"/> | <input type="checkbox"/> | <input type="checkbox"/> | <input type="checkbox"/>      |
| 6.           | Ansiedad (inquietud interna, se deja llevar por el pánico) .....                                                                   | <input type="checkbox"/> | <input type="checkbox"/> | <input type="checkbox"/> | <input type="checkbox"/>      |
| 7.           | Cansancio físico y mental (menor rendimiento<br>generalizado, problemas de memoria, menor concen-<br>tración, mala memoria) .....  | <input type="checkbox"/> | <input type="checkbox"/> | <input type="checkbox"/> | <input type="checkbox"/>      |
| 8.           | Problemas sexuales (alteraciones de la libido/deseo,<br>de la actividad y la satisfacción sexual) .....                            | <input type="checkbox"/> | <input type="checkbox"/> | <input type="checkbox"/> | <input type="checkbox"/>      |
| 9.           | Problemas de vejiga (dificultades a la hora de orinar,<br>mayor necesidad de orinar, incontinencia vesical) .....                  | <input type="checkbox"/> | <input type="checkbox"/> | <input type="checkbox"/> | <input type="checkbox"/>      |
| 10.          | Sequedad vaginal (sensación de sequedad o escozor<br>en la vagina, dificultades a la hora de realizar el coito) .....              | <input type="checkbox"/> | <input type="checkbox"/> | <input type="checkbox"/> | <input type="checkbox"/>      |
| 11.          | Molestias musculares y de las articulaciones,<br>(dolor en las articulaciones, reumatismos) .....                                  | <input type="checkbox"/> | <input type="checkbox"/> | <input type="checkbox"/> | <input type="checkbox"/>      |
